# Supplementary material
Source: publisher site journal article supplement (https://www.dovepress.com/article/284385)
Supplement: Supplementary file 1 [file get_supplementary_file.php]

**Supplementary material**
**Public Willingness to Participate in COVID-19 Vaccine Clinical Trials: A Study from Jordan**

**Informed Consent Form**

**Dear participant**

Researchers from different Jordanian Universities are carrying out a research project with the purpose to assess the participants’ willingness to participate in COVID-19 vaccine clinical trial in Jordan.

Your participation in this research study is voluntary. You may choose not to participate. If you decide to participate in this research survey, you may withdraw at any time.

We would like to confirm that all information provided here will be kept confidential. All data will be stored in a password protected electronic format. To help protect your confidentiality, the surveys will not contain information that will personally identify you, and will be used only for research purposes.

The procedure involves filling an online survey that will take approximately 15 minutes. Your participation in completing this survey is highly appreciated.

**ELECTRONIC CONSENT**: Please select your choice below.

Clicking on the "agree" button below indicates that:

1. You have read the above information
2. You voluntarily agree to participate

If you do not wish to participate in the research study, please decline participation by clicking on the "disagree" button.

- Agree
- Disagree

**Intention to Participate in COVID-19 Vaccine Clinical trial in Jordan**

**Part 1: Demographic characteristics**

Age: ____________________ (years)

Gender:

- Female
- Male

Education level:

- Nor educated
- School
- Diploma
- Bachelor
- Master/PhD

Personal income

- ≤500 JD/month
- 501-1000 JD/month
- 1001-2000 JD/month
- >2000 JD/month

Marital status

- Married
- Single
- Others

Nationality

- Jordanian
- Others

Place of residence

- South of Jordan
- Middle of Jordan
- North of Jordan

Do you have a biomedicine-related degree?

- Yes
- No

**Part 2. Clinical and medical information**

Your general health status

- Excellent
- Good
- Poor

Do you have any chronic comorbidity?

- Yes
- No

Did you receive any previous seasonal influenza vaccine?

- Yes
- No
- I am not sure

Have you ever participated in a clinical study?

- Yes
- No

**Part 3. COVID-19 experience**

# Have you been infected and diagnosed with COVID-19?

- Yes
- No

# Has someone you know been infected and diagnosed with COVID-19?

- Yes
- No

How do you rate your fear from COVID-19 (1 is low, 5 is high), Choices 1, 2, 3, 4, 5

- 1
- 2
- 3
- 4
- 5

Do you think that you have perceived individual risk to catch COVID-19?

- Yes
- No
- I am not sure

**Part 4. Public acceptance to participate in a COVID-19 vaccine clinical trial**

Read the following definition the continue answering the below questions:

“COVID-19 clinical trial is a study that involved challenging participants with the virus after they develop immunity”

Are you willing to participate in COVID-19 vaccine clinical trial?

- Yes
- No

If you are a parent, are you willing to let your child to participate in COVID-19 vaccine clinical trial?

- Yes
- No

In your opinion, what are the motivation that may encourage you to participate in such clinical trials:

1. To help finding treatment to COVID-19

- Yes
- No

1. To return to normal life

- Yes
- No

1. Vaccine might have population specific side effects and should be tested in Jordan

- Yes
- No

1. I have relatives with chronic diseases that might die if vaccine was not developed

- Yes
- No

1. I might receive good compensation for my participation

- Yes
- No

In your opinion, what are the barriers that may discourage you to participate in such clinical trials:

1. I don’t like to volunteer in clinical studies

- Yes
- No

1. I don’t trust pharmaceutical companies

- Yes
- No

1. I don’t want to be challenged with the virus

- Yes
- No

1. I have strong fear from the virus

- Yes
- No

1. My health status does not permit me to participate

- Yes
- No

1. I don’t have the time to participate

- Yes
- No

1. No need to conduct such studies in Jordan as the virus spread is under control

- Yes
- No
